# Supplementary material for: Patient Characteristics Associated With Admission to Low-Safety Inpatient Psychiatric Facilities: Evidence for Racial Inequities
Source: Atypon-hosted journal article supplement (doi:10.1176/appi.ps.202000657), 2021-05-17
Supplement: appi.ps.202000657.ds001.pdf [file appi.ps.202000657.ds001.pdf]

## Appendix A

| Individual complaints            |       |
|----------------------------------|-------|
|                                  | Mean  |
| Felony Committed                 | 0.088 |
| Behavioral Issue                 | 0.162 |
| Negligence                       | 0.670 |
| Sexual Abuse                     | 1.864 |
| Policy Issue                     | 0.024 |
| Human Right Violation            | 0.118 |
| Medicolegal Death <sup>a</sup>   | 4.174 |
| Staffing Issues                  | 0.157 |
| Physical Abuse                   | 0.822 |
| Theft                            | 0.000 |
| Missing/Damaged Property         | 0.000 |
| Attempted Suicide                | 1.483 |
| Treatment Issue                  | 0.056 |
| Medication Issue                 | 0.066 |
| Verbal Abuse                     | 0.107 |
| AWA from Unit                    | 0.000 |
| Environmental                    | 0.002 |
| Privacy/HIPAA                    | 0.024 |
| Restraint/Seclusion <sup>b</sup> | 1.275 |
| Other                            | 1.342 |

### Notes

These categories of complaints are pre-determined by the Massachusetts Department of Mental Health. Each complaint had a tag (or sometimes multiple tags) indicating what type of complaint it was by using the above categories. We also tested a version of the composite using information from only 2017, rather than five-year averages, but the alpha of the composite was weaker ( $\alpha = 0.63$ ) than the five-year average.

<sup>a</sup>Death is relatively high because it includes all known deaths that occur within 30-days of discharge, as facilities are required to report these deaths if they become aware of them. The majority of deaths are occurring post-discharge rather than while hospitalized according to the Department of Mental Health, although they could not disaggregate these numbers.

<sup>b</sup>These are complaints related to restraint and seclusion, which are separate from the episodes of restraint and seclusion that are also reported to the Massachusetts Department of Mental Health and the hours of restraint and seclusion that are reported to CMS' IPFQR program.

## Appendix B

Distribution of hospital-acquired injury rates between low and high-safety facilities

| With hospital-acquired injury |   | Low Safety<br>(N = 7,612) | High Safety<br>(N = 6,953) |
|-------------------------------|---|---------------------------|----------------------------|
|                               | N | 194                       | 113                        |
|                               | % | 2.6                       | 1.6                        |

## Appendix C

Average scores on the components and overall composites between low and high-safety facilities

| Standardized Measures <sup>a</sup>                         | Average reverse score |               |               |                |              |              |
|------------------------------------------------------------|-----------------------|---------------|---------------|----------------|--------------|--------------|
|                                                            | Low<br>safety         | [95% CI]      |               | High<br>safety | [95% CI]     |              |
| Rate of complaints not substantiated and not abuse-related | -1.23                 | [-1.26,       | -1.20]        | 0.76           | [0.76,       | 0.77]        |
| Rate of substantiated complaints                           | -0.88                 | [-0.91,       | -0.85]        | 0.50           | [0.50,       | 0.50]        |
| Rate of abuse-related complaints                           | -1.08                 | [-1.11,       | -1.05]        | 0.65           | [0.64,       | 0.66]        |
| Rate of episodes of restraint                              | -0.99                 | [-1.00,       | -0.97]        | 1.22           | [1.22,       | 1.23]        |
| Rate of episodes of seclusion                              | -0.45                 | [-0.46,       | -0.43]        | 0.49           | [0.49,       | 0.49]        |
| Rate of hours of restraint                                 | -0.62                 | [-0.65,       | -0.60]        | 0.85           | [0.85,       | 0.86]        |
| Rate of hours of seclusion                                 | -0.65                 | [-0.70,       | -0.61]        | 0.32           | [0.32,       | 0.32]        |
| <b>Composite</b>                                           | <b>-0.84</b>          | <b>[-0.85</b> | <b>-0.83]</b> | <b>0.69</b>    | <b>[0.68</b> | <b>0.69]</b> |

Notes

<sup>a</sup>For substantiated complaints and abuse-related complaints, those would get a weight of two rather than one. For abuse-related complaints, those complaints that were substantiated would get a weight of three as opposed to two.

## Appendix D

| Characteristics among the middle 60% safety group (N = 24, 563) |        |      |
|-----------------------------------------------------------------|--------|------|
|                                                                 | n      | %    |
| Prior Emergency Department Visit                                | 17,446 | 71.0 |
| <i>Severity Score</i>                                           |        |      |
| Least Severe                                                    | 7,925  | 32.3 |
| Moderate Severe                                                 | 13,481 | 54.9 |
| Most Severe                                                     | 3,157  | 12.9 |
| Transferred                                                     | 5,501  | 22.4 |
| Prior 30-day Admission                                          | 4,194  | 16.4 |
| Less than 100-day prior Admission                               | 7,080  | 28.8 |
| Had any substance use disorder                                  | 12,886 | 52.5 |
| Opioid use disorder                                             | 4,300  | 17.5 |
| Alcohol use disorder                                            | 9,435  | 38.4 |
| Other substance use disorder                                    | 3,208  | 13.1 |
| Bipolar Diagnosis                                               | 4,912  | 20.0 |
| Schizophrenia Diagnosis                                         | 4,931  | 20.1 |
| Homelessness                                                    | 3,257  | 13.3 |
| <i>Race</i>                                                     |        |      |
| Non-Hispanic White                                              | 19,122 | 78.0 |
| Non-Hispanic Black                                              | 1,928  | 7.9  |
| Non-Hispanic Asian                                              | 335    | 1.4  |
| Non-Hispanic "other" race                                       | 833    | 3.4  |
| Hispanic/Latinx                                                 | 2,290  | 9.3  |
| <i>Age</i>                                                      |        |      |
| 18-24                                                           | 2,557  | 10.5 |
| 25-34                                                           | 4,947  | 20.4 |
| 35-45                                                           | 4,761  | 19.6 |
| 46-64                                                           | 8,422  | 34.7 |
| 64+                                                             | 3,244  | 13.4 |
| Female                                                          | 10,948 | 44.6 |
| <i>Payment</i>                                                  |        |      |
| Private Insurance                                               | 7,470  | 30.4 |
| Self-pay/uninsured                                              | 195    | 0.8  |
| Medicaid                                                        | 7,421  | 30.2 |
| Medicare                                                        | 8,772  | 35.7 |
| Other                                                           | 705    | 2.9  |
| <i>Geography</i>                                                |        |      |
| Rural                                                           | 956    | 4.0  |
| Closest hospital is low safety                                  | 4,192  | 18.0 |
| Closest hospital is high safety                                 | 2,806  | 12.1 |
| Was admitted to closest hospital                                | 3,308  | 14.2 |

### Notes

<sup>a</sup>Prior admission rates build.

<sup>b</sup>196 (0.5% of adult discharges) had missingness on the race variable.

<sup>c</sup>529 had missing age information (1.3% of total sample, including children).

<sup>d</sup>1,069 (2.7% of adult discharges) had missing rurality information.

<sup>e</sup>1,896 (4.9% of adult discharges) had missingness on the proximity variables.

Proportion is reported excluding missingness from the denominator.

## Appendix E

Multinomial logistic regression models comparing predictors of risk of admission to a middle-safety versus high-safety (reference) facility

|                                                 |                                        | <b>Model 1</b><br>(N = 38,404) |          | <b>Model 2</b><br>(N = 38,393) |          | <b>Model 3</b><br>(N = 36,441) |          |
|-------------------------------------------------|----------------------------------------|--------------------------------|----------|--------------------------------|----------|--------------------------------|----------|
|                                                 |                                        | RRR                            | <i>p</i> | RRR                            | <i>p</i> | RRR                            | <i>p</i> |
| <i>Severity (ref = least severe)</i>            |                                        |                                |          |                                |          |                                |          |
|                                                 | Moderate Severe                        | 1.08                           | 0.02     | 1.08                           | 0.03     | 1.13                           | <0.01    |
|                                                 | Most Severe                            | 1.13                           | 0.01     | 1.12                           | 0.02     | 1.23                           | <0.01    |
|                                                 | Transferred                            | 1.18                           | <0.01    | 1.19                           | <0.01    | 2.18                           | <0.01    |
|                                                 | Prior 30-day Admission                 | 1.12                           | 0.05     | 1.11                           | 0.06     | 1.15                           | 0.04     |
|                                                 | Less than 100-day Admission            | 1.23                           | <0.01    | 1.22                           | <0.01    | 1.17                           | <0.01    |
|                                                 | Opioid use disorder                    | 1.75                           | <0.01    | 1.73                           | <0.01    | 1.70                           | <0.01    |
|                                                 | Alcohol use disorder                   | 1.10                           | <0.01    | 1.10                           | 0.01     | 1.10                           | 0.02     |
|                                                 | Other substance use disorder           | 1.23                           | <0.01    | 1.22                           | <0.01    | 1.30                           | <0.01    |
|                                                 | Bipolar Diagnosis                      | 0.92                           | 0.02     | 0.92                           | 0.02     | 0.99                           | 0.76     |
|                                                 | Schizophrenia Diagnosis                | 1.18                           | <0.01    | 1.18                           | <0.01    | 1.07                           | 0.13     |
|                                                 | Homelessness                           | 1.30                           | <0.01    | 1.28                           | <0.01    | 1.16                           | 0.01     |
| <i>Race (ref = White)</i>                       |                                        |                                |          |                                |          |                                |          |
|                                                 | Non-Hispanic Black                     | 1.85                           | <0.01    | 1.83                           | <0.01    | 1.59                           | <0.01    |
|                                                 | Non-Hispanic Asian                     | 3.95                           | <0.01    | 3.98                           | <0.01    | 3.13                           | <0.01    |
|                                                 | Non-Hispanic "other" race              | 1.56                           | <0.01    | 1.56                           | <0.01    | 1.48                           | <0.01    |
|                                                 | Hispanic/Latinx                        | 1.96                           | <0.01    | 1.93                           | <0.01    | 1.59                           | <0.01    |
| <i>Age (ref = 18-24)</i>                        |                                        |                                |          |                                |          |                                |          |
|                                                 | 25-34                                  | 1.02                           | 0.70     | 1.00                           | 0.98     | 1.05                           | 0.46     |
|                                                 | 35-45                                  | 1.01                           | 0.86     | 0.99                           | 0.86     | 1.05                           | 0.48     |
|                                                 | 46-64                                  | 0.84                           | <0.01    | 0.83                           | <0.01    | 0.92                           | 0.16     |
|                                                 | 64+                                    | 0.59                           | <0.01    | 0.59                           | <0.01    | 0.63                           | <0.01    |
|                                                 | Female                                 | 0.97                           | 0.29     | 0.97                           | 0.31     | 1.00                           | 0.92     |
|                                                 | Emergency Department                   | 0.85                           | <0.01    | 0.85                           | <0.01    | 0.73                           | <0.01    |
|                                                 | Emergency Department X Transferred     | 5.65                           | <0.01    | 5.65                           | <0.01    | 4.32                           | <0.01    |
| <b>Payment and Geographical Characteristics</b> |                                        |                                |          |                                |          |                                |          |
| <i>Payment</i>                                  |                                        |                                |          |                                |          |                                |          |
|                                                 | Self-pay/uninsured                     |                                |          | 0.82                           | 0.20     | 0.86                           | 0.44     |
|                                                 | Medicaid                               |                                |          | 1.15                           | <0.01    | 1.09                           | 0.06     |
|                                                 | Medicare                               |                                |          | 1.06                           | 0.13     | 0.99                           | 0.89     |
| <i>Geography</i>                                |                                        |                                |          |                                |          |                                |          |
|                                                 | Rural                                  |                                |          |                                |          | 1.20                           | 0.04     |
|                                                 | Closest hospital is low safety         |                                |          |                                |          | 0.36                           | <0.01    |
|                                                 | Closest hospital is high safety        |                                |          |                                |          | 0.05                           | <0.01    |
|                                                 | Rural X Closest hospital is low safety |                                |          |                                |          | 0.22                           | <0.01    |
|                                                 | Constant                               | 2.85                           | <0.01    | 2.77                           | 0<0.01   | 8.92                           | <0.01    |
| <b>R2</b>                                       |                                        | 3.05%                          |          | 3.49%                          |          | 19.39%                         |          |

### Notes

The sample size for each model differs given missingness on predictors, notably geographical characteristics. In total, there was a missing rate of 1.9% for both models 1 and 2 and 6.9% for model 3. When using multiple imputation to address missingness, the results were qualitatively unchanged.

<sup>a</sup>RRR = Relative Risk Ratio

## Appendix F

Restricted sample sensitivity analysis: Multinomial logistic regression models comparing predictors of risk of admission to a low-safety versus high-safety (reference) facility

|                                                 |                                        | <b>Model 3</b> |          |
|-------------------------------------------------|----------------------------------------|----------------|----------|
|                                                 |                                        | (N = 23,477)   |          |
|                                                 |                                        | RRR            | <i>p</i> |
| <b>Clinical and Demographic Characteristics</b> |                                        |                |          |
| <i>Severity (ref = least severe)</i>            |                                        |                |          |
|                                                 | Moderate Severe                        | 1.22           | <0.01    |
|                                                 | Most Severe                            | 1.03           | <0.01    |
| Transferred                                     |                                        | 3.38           | <0.01    |
| Prior 30-day Admission                          |                                        | 1.21           | 0.10     |
| Less than 100-day prior Admission               |                                        | 1.00           | 0.97     |
| Opioid use disorder                             |                                        | 1.39           | <0.01    |
| Alcohol use disorder                            |                                        | 0.97           | 0.57     |
| Other substance use disorder                    |                                        | 1.36           | <0.01    |
| Bipolar Diagnosis                               |                                        | 0.94           | 0.32     |
| Schizophrenia Diagnosis                         |                                        | 1.28           | <0.01    |
| Homelessness                                    |                                        | 1.20           | 0.03     |
| <i>Race (ref = White)</i>                       |                                        |                |          |
|                                                 | Non-Hispanic Black                     | 1.57           | <0.01    |
|                                                 | Non-Hispanic Asian                     | 5.25           | <0.01    |
|                                                 | Non-Hispanic "other" race              | 2.26           | <0.01    |
|                                                 | Hispanic/Latinx                        | 1.22           | 0.05     |
| <i>Age (ref = 18-24)</i>                        |                                        |                |          |
|                                                 | 25-34                                  | 0.93           | 0.49     |
|                                                 | 35-45                                  | 1.01           | 0.94     |
|                                                 | 46-64                                  | 0.95           | 0.58     |
|                                                 | 64+                                    | 0.56           | <0.01    |
| Female                                          |                                        | 0.96           | 0.45     |
| Emergency Department                            |                                        | 0.87           | 0.05     |
| Emergency Department X Transferred              |                                        | 2.45           | <0.01    |
| <b>Payment and Geographical Characteristics</b> |                                        |                |          |
| <i>Payment (ref = private insurance)</i>        |                                        |                |          |
|                                                 | Self-pay/uninsured                     | 1.94           | 0.01     |
|                                                 | Medicaid                               | 1.53           | <0.01    |
|                                                 | Medicare                               | 1.20           | 0.01     |
| <i>Geography</i>                                |                                        |                |          |
|                                                 | Rural                                  | 0.35           | <0.01    |
|                                                 | Closest hospital is low safety         | 2.27           | <0.01    |
|                                                 | Closest hospital is high safety        | 0.10           | <0.01    |
|                                                 | Rural X Closest hospital is low safety | 0.18           | 0.02     |
|                                                 | Constant                               | 1.09           | 0.46     |
| <b>R2</b>                                       |                                        | 20.14%         |          |

### Notes

This model is restricted to a random sample of only one discharge per individual to address potential confounding by multiple admissions of the same individual in the study period.
